# Supplementary material for: An efficient whole-cell platform for Rebaudioside M biotransformation: cascade design, expression regulation, process engineering
Source: Royal Society of Chemistry journal article supplement (doi:10.1039/d5gc04865f), 2025-12-29
Supplement: d5gc04865f1.pdf [file d5gc04865f1.pdf]

## Supplementary Information

### **An efficient whole-cell platform for Rebaudioside M biotransformation: cascade design, expression regulation, process engineering**

Yang Wang<sup>a</sup>, Xiang Luo<sup>a</sup>, Man Zhou<sup>a</sup>, Xiaojie Yu<sup>a</sup>, Li Chen<sup>b</sup>, Lina Wu<sup>c</sup>, Cunshan Zhou<sup>a,\*</sup>,

<sup>a</sup> *School of Food and Biological Engineering, Jiangsu University, Zhenjiang 212013, China*

<sup>b</sup> *Co-Innovation Center of Jiangsu Marine Bio-industry Technology, Jiangsu Ocean University,  
Lianyungang 222005, China*

<sup>c</sup> *School of Food Science and Pharmaceutical Engineering, Nanjing Normal University,  
Nanjing, 210023, China*

*\*Corresponding author:*

*Address: School of Food and Biological Engineering, Jiangsu University, 301 Xuefu Road,  
Zhenjiang 212013, China.*

*Phone: +86-511-88790211*

*E-mail: [cunshanzhou@163.com](mailto:cunshanzhou@163.com)*

## 1. Experimental section

### 1.1. Strains, Vectors, and Materials

The dual-expression vector pRSFDuet-1 was used for the overexpression of *UGT76G1* and *GmSuSy* genes. *E. coli* DH5 $\alpha$  was used for plasmid construction, and BL21(DE3) served as the expression host. Restriction enzymes were purchased from Takara (Beijing, China). FastPfu Fly DNA Polymerase for gene amplification and MultiF Seamless Assembly Mix for plasmid assembly were obtained from TransGen Biotech (Beijing, China) and ABclonal (Wuhan, China), respectively. Other molecular biology reagents and kits were purchased from Sangon Biotech (Shanghai, China).

Standard compounds Reb-M and Reb-D, as well as the substrate Reb-D for whole-cell catalysis, were purchased from Yuanye Bio-Technology Co., Ltd. (Shanghai, China) and Green Biological Preparation Co., Ltd. (Xinghua, China). Ultrapure water for HPLC was purchased by Wahaha Group Co., Ltd. (Hangzhou, China), and acetonitrile was from Meryer (Shanghai, China). All other analytical-grade chemicals were obtained from Aladdin (Shanghai, China) and Sigma-Aldrich (USA).

### 1.2. Plasmid construction

The gene encoding *UGT76G1* from *S. rebaudiana* (accession number: Q6VAB4), containing the structure-guided mutations T284S, M88L, and L200A<sup>1</sup>, and the *GmSuSy* gene from *Glycine max* (accession number: AAC39323), were codon-optimized for *E. coli* using the online tool ExpOptimizer (NovoPro Bioscience, Shanghai, China) and synthesized by Sangon Biotech (Shanghai, China). The codon-optimized gene fragments were amplified by PCR and assembled into the multiple cloning sites (MCS) of pRSFDuet-1 via Gibson assembly. *UGT76G1* was inserted into MCS1 and *GmSuSy* into MCS2, yielding the recombinant plasmid pRSF-UGT76G1-*GmSuSy*.

Based on this plasmid, a series of constructs carrying dual or triple copies of the *UGT76G1* expression cassette were generated via PCR amplification and Gibson assembly. To further enhance UDP-Glc regeneration and modulate the expression level of *GmSuSy*, seven ribosome binding site (RBS) sequences with varying predicted

translation initiation strengths were selected based on annotation and reported performance in the MIT BioStandard Parts Registry ([https://parts.igem.org/Main\\_Page](https://parts.igem.org/Main_Page)). Primers containing the corresponding RBS sequences were synthesized by Sangon Biotech (Shanghai, China) and used to replace the original RBS upstream of *GmSuSy* in the pRSF-UGT76G1-*GmSuSy* plasmid via PCR, followed by Gibson assembly, generating seven additional plasmid variants.

Colony PCR and Sanger sequencing verified all recombinant plasmids, and then transformed them into *E. coli* DH5 $\alpha$  for amplification, and subsequently introduced into *E. coli* BL21 (DE3) to obtain engineered strains BL0-BL9 for expression and catalytic evaluation.

### **1.3. Enzyme Activity Assays**

Enzymatic activities of *GmSuSy* and UGT76G1 were determined using crude enzyme extracts. Sucrose synthase activity was quantified based on the formation of a purple fructose-bicinchoninic acid complex as described by Waffenschmidt and Jaenicke (1987) with minor modifications. The standard reaction mixture (1.0 mL) contained 50 mM phosphate buffer (pH 6.5), 100 mM sucrose, and 10 mM UDP. Reactions were initiated by enzyme addition, incubated at 40 °C for 10 min, and terminated by boiling at 100 °C. After centrifugation (12,000 rpm, 5 min), 25  $\mu$ L of the supernatant was mixed with 150  $\mu$ L of chromogenic reagent (Solution A : Solution B : ethanol = 23 : 1 : 9), where Solution A contained 62.3 g/L Na<sub>2</sub>CO<sub>3</sub> and 1.5 g/L 2,2'-bicinchoninic acid dipotassium salt, and Solution B contained 33 g/L Na<sub>2</sub>CO<sub>3</sub>, 7.3 g/L CuSO<sub>4</sub>, and 23 g/L aspartic acid. The mixture was incubated at 70 °C for 30 min, cooled to room temperature, and absorbance was recorded at 560 nm using a microplate reader. One unit of sucrose synthase activity (1 U) was defined as the amount of enzyme required to produce 1  $\mu$ mol fructose per minute under assay conditions.

UGT76G1 activity was determined based on Reb-D conversion to Reb-M following Guo et al. (2022) with minor modifications. A 200  $\mu$ L reaction system containing 2 mM Reb-D, 5 mM UDP-Glc, and 50 mM Tris-HCl (pH 8.0) was pre-equilibrated at 40 °C, initiated by addition of crude enzyme, and incubated for 20 min. Reactions were

terminated at 95 °C for 5 min, diluted five-fold with methanol, centrifuged at 20,000 × g for 5 min, and filtrated through a 0.22 µm organic membrane. Reb-M was quantified by UPLC, and one unit (1U) of UGT76G1 activity was defined as the amount of enzyme required to form 1 µmol Reb-M per minute under the above conditions.

#### ***1.4. Analytical methods***

At designated time points, 1 mL of the whole-cell reaction mixture was withdrawn and centrifuged at 12,000 × g for 10 minutes at 4 °C. The resulting supernatant was diluted 5-fold with deionized water, filtered through a 0.22 µm cellulose membrane (Millipore, USA) prior to HPLC analysis.

Reb-D and Reb-M were quantified using an Agilent 1260 HPLC system (Agilent Technologies, Santa Clara, CA, USA) equipped with a UV detector. Chromatographic separation was employed on a Poroshell 120 EC-C18 column (4.6 mm × 150 mm, 2.7 µm) maintained at 40 °C. Detection was set at 210 nm. Isocratic elution used methanol (solvent A, 68%) and 0.1% phosphoric acid in water (solvent B, 32%) at a flow rate of 1.0 mL/min. The injection volume was 10 µL. Reb-D and Reb-M were identified and quantified by external calibration against standard curves generated from commercial standards. The conversion rate of Reb-D and the yield of Reb-M were calculated as follows:

$$\text{The conversion of Reb-D (\%)} = (C_{d0} - C_{dt}) / C_{d0} \times 100\%$$

Where  $C_{dt}$  (mg/L) was the concentration of Reb-D after the reaction,  $C_{d0}$  (mg/L) was the concentration of Reb-D before the reaction. Unless otherwise stated, all experiments were performed in at least three independent biological replicates ( $n \geq 3$ ), and data are reported as mean ± SD. Group differences were evaluated using Duncan's multiple range test in SPSS v23.0 (IBM, USA), with  $p < 0.05$  considered statistically significant.

## 2. Supplemental tables and figures

**Table S1.** Primers used in this study.

| Plasmids                                    | Characteristics                                                                       | Source     |
|---------------------------------------------|---------------------------------------------------------------------------------------|------------|
| pRSFDuet-1                                  | RSF1030; Kan <sup>R</sup> ; Two T7; MCS1 & MCS2; His-tag (MCS1);                      | Lab stock  |
| pRSF-DTE                                    | pRSFDuet-1 ligated with genes <i>DTE</i>                                              | Lab stock  |
| pRSF-UGT76G1                                | pRSFDuet-1 ligated with genes <i>UGT76G1</i>                                          | This study |
| pRS- <i>GmSuSy</i>                          | pRSFDuet-1 ligated with genes <i>GmSuSy</i>                                           | This study |
| pRSF-UGT76G1- <i>GmSuSy</i>                 | Co-expression of UGT76G1 (MCS1) and <i>GmSuSy</i> (MCS2) in pRSFDuet-1                | This study |
| pRSF-(UGT76G1) <sub>2</sub> - <i>GmSuSy</i> | Co-expression of two copies of UGT76G1 and <i>GmSuSy</i> in pRSFDuet-1                | This study |
| pRSF-(UGT76G1) <sub>3</sub> - <i>GmSuSy</i> | Co-expression of three copies of UGT76G1 and <i>GmSuSy</i> in pRSFDuet-1              | This study |
| /pRSF-U <sub>3</sub> *S                     |                                                                                       |            |
| pRSF (BBa_B0030)-U <sub>3</sub> *S          | pRSF-U <sub>3</sub> *S with RBS (BBa_B0030) replacing the native RBS of <i>GmSuSy</i> | This study |
| pRSF (BBa_B0031)-U <sub>3</sub> *S          | pRSF-U <sub>3</sub> *S with RBS (BBa_B0031) replacing the native RBS of <i>GmSuSy</i> | This study |
| pRSF (BBa_B0032)-U <sub>3</sub> *S          | pRSF-U <sub>3</sub> *S with RBS (BBa_B0032) replacing the native RBS of <i>GmSuSy</i> | This study |
| pRSF (BBa_B0033)-U <sub>3</sub> *S          | pRSF-U <sub>3</sub> *S with RBS (BBa_B0033) replacing the native RBS of <i>GmSuSy</i> | This study |
| pRSF (BBa_B0034)-U <sub>3</sub> *S          | pRSF-U <sub>3</sub> *S with RBS (BBa_B0034) replacing the native RBS of <i>GmSuSy</i> | This study |

|                                     |                                                                                       |            |
|-------------------------------------|---------------------------------------------------------------------------------------|------------|
| pRSF (BBa_B0035)-U <sub>3</sub> *S  | pRSF-U <sub>3</sub> *S with RBS (BBa_B0035) replacing the native RBS of <i>GmSuSy</i> | This study |
| pRSF (BBa_B0064)-U <sub>3</sub> *S  | pRSFDuet-1 with RBS (BBa_B0064) replacing the native RBS of <i>GmSuSy</i>             | This study |
| pRSF (BBa_J61100)-U <sub>3</sub> *S | pRSFDuet-1 with RBS (BBa_J61100) replacing the native RBS of <i>GmSuSy</i>            | This study |
| pRSF (BBa_J61101)-U <sub>3</sub> *S | pRSFDuet-1 with RBS (BBa_J61101) replacing the native RBS of <i>GmSuSy</i>            | This study |
| pRSF (BBa_J61102)-U <sub>3</sub> *S | pRSFDuet-1 with RBS (BBa_J61102) replacing the native RBS of <i>GmSuSy</i>            | This study |
| pRSF (BBa_J61104)-U <sub>3</sub> *S | pRSFDuet-1 with RBS (BBa_J61104) replacing the native RBS of <i>GmSuSy</i>            | This study |
| pRSF (BBa_J61107)-U <sub>3</sub> *S | pRSFDuet-1 with RBS (BBa_J61107) replacing the native RBS of <i>GmSuSy</i>            | This study |
| pRSF (BBa_J61117)-U <sub>3</sub> *S | pRSFDuet-1 with RBS (BBa_J61117) replacing the native RBS of <i>GmSuSy</i>            | This study |
| pRSF(BBa_J61127)-U <sub>3</sub> *S  | pRSFDuet-1 with RBS (BBa_J61127) replacing the native RBS of <i>GmSuSy</i>            | This study |

---

**Table S2.** Primers used in this study.

| Primers                                                                     | Sequence (5'-3')                                |
|-----------------------------------------------------------------------------|-------------------------------------------------|
| <b>Primers for <i>Co-expression of two copies of UGT76G1 and GmSuSy</i></b> |                                                 |
| <i>UGT76G1</i> -F                                                           | CACCACAGCCAGGATCCGATGGAAAACAAAACCGAAACCA        |
| <i>UGT76G1</i> -R                                                           | AAGCATTATGCGGCCGCAAGCTTTTACAGGCTGCTGATATA       |
| <i>GmSuSy</i> -F                                                            | TATAAGAAGGAGATATACATAATGGCTACCGATCGTCTGACCCGTG  |
| <i>GmSuSy</i> -R                                                            | TTACCAGACTCGAGGGTACCTTATTCCGCCGCCAGCGGCACGGAT   |
| MCS1-F                                                                      | AAGCTTGCGGCCGCATAATGCTTAA                       |
| MCS1-R                                                                      | CGGATCCTGGCTGTGGTGATGATGG                       |
| MCS2-F                                                                      | GGTACCCTCGAGTCTGGTAA                            |
| MCS2-R                                                                      | TATGTATATCTCCTTCTTATACTTAACTAATATAC             |
| <b>Primers for multi-copy <i>UGT76G1</i></b>                                |                                                 |
| ( <i>UGT76G1</i> ) <sub>2</sub> -F1                                         | TATAAGAAGGAGATATACATATGATGTCCCTGGCAATCATCCCAG   |
| ( <i>UGT76G1</i> ) <sub>2</sub> -R1                                         | TTACCAGACTCGAGGGTACCTTACAGGCTGCTGATATAGC        |
| ( <i>UGT76G1</i> ) <sub>2</sub> -F2                                         | TATGTATATCTCCTTCTTATACTTAACTAATATAC             |
| ( <i>UGT76G1</i> ) <sub>2</sub> -R2                                         | GGTACCCTCGAGTCTGGTAA                            |
| ( <i>UGT76G1</i> ) <sub>3</sub> -F1                                         | TCGAACAGAAAGTAATCGTTGCGACTCCTGCATTAGGAA         |
| ( <i>UGT76G1</i> ) <sub>3</sub> -R1                                         | ATGCGGCCGTGTACAATCTTCTCAAATGCCTGAGGTT           |
| ( <i>UGT76G1</i> ) <sub>3</sub> -F2                                         | ACGATTACTTTCTGTTCGACTTAAG                       |
| ( <i>UGT76G1</i> ) <sub>3</sub> -R2                                         | ATTGTACACGGCCGCATAATCG                          |
| <b>Primers for the RBS of <i>GmSuSy</i></b>                                 |                                                 |
| BBa_B0029-F                                                                 | TTCACACAGGAAACCATATACATAATGGCTACCGATCGTCTGA     |
| BBa_B0029-R                                                                 | TATGTATATGGTTTCCTGTGTGAAACTAATATACTAAGATG       |
| BBa_B0030-F                                                                 | AATTAAAGAGGAGAAAATATACATAATGGCTACCGATCGTCTGA    |
| BBa_B0030-R                                                                 | TATGTATATTTTCTCCTCTTTAATTAACTAATATACTAAGATG     |
| BBa_B0031-F                                                                 | TCACACAGGAAACCATATACATAATGGCTACCGATCGTCTGA      |
| BBa_B0031-R                                                                 | TATGTATATGGTTTCCTGTGTGAAACTAATATACTAAGATG       |
| BBa_B0032-F                                                                 | TCACACAGGAAAGATATACATAATGGCTACCGATCGTCTGA       |
| BBa_B0032-R                                                                 | TATGTATATCTTTTCCTGTGTGAAACTAATATACTAAGATGAAGATG |

|             |                                             |
|-------------|---------------------------------------------|
| BBa_B0034-F | AAAGAGGAGAAAATATACATAATGGCTACCGATCGTCTGA    |
| BBa_B0034-R | TATGTATATTTTCTCCTCTTTAACTAATATACTAAGATG     |
| BBa_B0035-F | ATTAAAGAGGAGAAAATATACATAATGGCTACCGATCGTCTGA |
| BBa_B0035-R | TATGTATATTTCTCCTCTTTAATAACTAATATACTAAGATG   |
| BBa_B0064-F | AAAGAGGGGAAAATATACATAATGGCTACCGATCGTCTGA    |
| BBa_B0064-R | TATGTATATTTTCCCCTCTTTAACTAATATACTAAGATG     |

---



**Table S3.** Strains used in this study.

| Strains                      | Characteristics                                                                                                                                                                                                                                                      | Resources  |
|------------------------------|----------------------------------------------------------------------------------------------------------------------------------------------------------------------------------------------------------------------------------------------------------------------|------------|
| <i>E. coli</i> DH5 $\alpha$  | F <sup>-</sup> , $\phi 80d$ , <i>lacZ</i> $\Delta$ M15 $\Delta$ ( <i>lacZYA-argF</i> ) U169, <i>endA1</i> , <i>recA1</i> , <i>hsdR17</i> ( <i>r<sub>K</sub><sup>-</sup> m<sub>K</sub><sup>-</sup></i> ), <i>supE44</i> , <i>thi-1</i> , <i>gyrA96</i> , <i>relA1</i> | Lab stock  |
| <i>E. coli</i> BL21 (DE3)/BL | F <sup>-</sup> , <i>ompT</i> , <i>hsdSB</i> ( <i>r<sub>B</sub><sup>-</sup> m<sub>B</sub><sup>-</sup></i> ), <i>gal</i> , <i>dcm</i> , <i>rne131</i> (DE3)                                                                                                            | Lab stock  |
| BL0                          | BL harboring plasmid pRSF-UGT76G1- <i>GmSuSy</i>                                                                                                                                                                                                                     | This study |
| BL1                          | BL harboring plasmid pRSF-(UGT76G1) <sub>2</sub> - <i>GmSuSy</i>                                                                                                                                                                                                     | This study |
| BL2                          | BL harboring plasmid pRSF-(UGT76G1) <sub>3</sub> - <i>GmSuSy</i>                                                                                                                                                                                                     | This study |
| BL3                          | BL harboring plasmid pRSF-(UGT76G1) <sub>3</sub> - <i>GmSuSy</i> , <i>GmSuSy</i><br>RBS replaced with BBa_B0029                                                                                                                                                      | This study |
| BL4                          | BL harboring plasmid pRSF-UGT76G1- <i>GmSuSy</i> , <i>GmSuSy</i><br>RBS replaced with BBa_B0030                                                                                                                                                                      | This study |
| BL5                          | BL harboring plasmid pRSF-UGT76G1- <i>GmSuSy</i> , <i>GmSuSy</i><br>RBS replaced with BBa_B0031                                                                                                                                                                      | This study |
| BL6                          | BL harboring plasmid pRSF-UGT76G1- <i>GmSuSy</i> , <i>GmSuSy</i><br>RBS replaced with BBa_B0032                                                                                                                                                                      | This study |
| BL7                          | BL harboring plasmid pRSF-UGT76G1- <i>GmSuSy</i> , <i>GmSuSy</i><br>RBS replaced with BBa_B0033                                                                                                                                                                      | This study |
| BL8                          | BL harboring plasmid pRSF-UGT76G1- <i>GmSuSy</i> , <i>GmSuSy</i><br>RBS replaced with BBa_B0035                                                                                                                                                                      | This study |
| BL9                          | BL harboring plasmid pRSF-UGT76G1- <i>GmSuSy</i> , <i>GmSuSy</i><br>RBS replaced with BBa_B0036                                                                                                                                                                      | This study |
| BL10                         | BL harboring plasmid pRSF-DTE,                                                                                                                                                                                                                                       | Lab stock  |

**Table S4.** Composition of culture media used for expression screening.

| Medium                       | Composition (per liter)                                                                                                                                                                        |
|------------------------------|------------------------------------------------------------------------------------------------------------------------------------------------------------------------------------------------|
| Luria-Bertani<br>(LB)        | 10 g tryptone, 5 g yeast extract, 10 g NaCl (Adjust pH to 7.0)                                                                                                                                 |
| Terrific Broth (TB)          | 12 g tryptone, 24 g yeast extract, 4 mL glycerol; 17 mM KH <sub>2</sub> PO <sub>4</sub> , 72 mM K <sub>2</sub> HPO <sub>4</sub> (Sterilize phosphate buffer separately; combine after cooling) |
| 2×YT                         | 16 g tryptone, 10 g yeast extract, 5 g NaCl (Adjust pH to 7.0)                                                                                                                                 |
| Super Broth (SB)             | 32 g tryptone, 20 g yeast extract, 5 g NaCl                                                                                                                                                    |
| Super Optimal Broth<br>(SOB) | 20 g tryptone, 5 g yeast extract, 0.5 g NaCl, 2.5 mM KCl, 10 mM MgCl <sub>2</sub> (Adjust pH to 7.0)                                                                                           |
| SOC                          | SOB + 20 mM glucose (Add glucose after sterilization via filter (0.22 μm))                                                                                                                     |

All media were prepared with deionized water and sterilized by autoclaving unless otherwise specified. SOC medium was prepared fresh and used within 24 h for optimal performance. All chemicals were purchased from Sigma-Aldrich unless otherwise indicated.

**Table S5.** Kinetic parameters of sucrose synthase (SuSy) for sucrose cleavage.

| Origin                      | Isoforms | Temperature | pH  | $K_m$ (mM) | $K_{cat}$ (s <sup>-1</sup> ) <sup>f</sup> | Reference |
|-----------------------------|----------|-------------|-----|------------|-------------------------------------------|-----------|
| <i>Plant SuSys</i>          |          |             |     |            |                                           |           |
| <i>Arabidopsis thaliana</i> | SuSy1    | 25°C        | 6.0 | 31.58      | 7.3                                       | 2         |
|                             |          | 37°C        | 7.0 | 53         | 907                                       | 3         |
|                             | SuSy3    | 25°C        | 6.0 | 108.2      | 4.6                                       | 2         |
|                             |          | 37°C        | 7.0 | 48         | 1470                                      | 3         |
|                             | SuSy1    | 30°C        | 7.5 | 32.1       | n.a.                                      | 4         |
|                             | SuSy2    | 30°C        | 7.5 | 42.7       | n.a.                                      | 4         |
| <i>Pisum sativum</i>        | SuSy3    | 30°C        | 7.5 | 67.5       | n.a.                                      | 4         |
|                             | SuSy1    | 37°C        | 7.0 | 28.2       | n.a.                                      | 5         |
| <i>Phaseolus aureus</i>     | n.a.     | 25°C        | 7.5 | 17         | n.a.                                      | 6         |
| <i>Ipomoea batatas</i>      | n.a.     | 37°C        | 7.0 | 31         | n.a.                                      | 7         |
| <i>Glycine max</i>          | n.a.     | 37°C        | 7.5 | 31.3       | 20.0                                      | 8         |
| <i>Hordeum vulgare</i>      | n.a.     | 37°C        | 7.0 | 30         | 435                                       | 9         |
| <i>Prunus persica</i>       | n.a.     | 25°C        | 7.0 | 62.5       | n.a.                                      | 10        |

|                                    |      |      |     |       |      |    |
|------------------------------------|------|------|-----|-------|------|----|
| <i>Lycopersicon</i>                | n.a. | 25°C | 6.5 | 53    | n.a. | 11 |
| <i>Manihot utilissima</i>          | n.a. | 25°C | 6.5 | 10    | n.a. | 12 |
| <i>Oryza sativa</i>                | n.a. | 37°C | 5.0 | 30    | n.a. | 13 |
| <i>Solanum tuberosum</i>           | n.a. | 37°C | 6.0 | 55    | n.a. | 13 |
| <i>Zea mays</i>                    | n.a. | 30°C | 6.5 | 40    | n.a. | 14 |
| <i>Beta vulgaris</i>               | n.a. | 35°C | 6.5 | 100   | n.a. | 15 |
| <i>Stevia rebaudiana</i>           | n.a. | 55°C | 7.0 | 95.61 | 36.4 | 16 |
| <b><i>Bacterial SuSys</i></b>      |      |      |     |       |      |    |
| <i>Acidithiobacillus caldus</i>    | n.a. | 60°C | 7.0 | 7.8   | 82.0 | 17 |
| <i>Nitrosomonas europaea</i>       | n.a. | 60°C | 7.0 | 321   | 96.7 | 17 |
| <i>Thermosynechoccus elongatus</i> | n.a. | 60°C | 7.0 | 1.3   | 3.5  | 18 |
| <i>Anabaena sp.</i>                | n.a. | 60°C | 6.5 | 303   | n.a. | 19 |
| <i>Micractinium conductrix</i>     | n.a. | 60°C | 7.0 | 0.14  | 17.3 | 20 |

Note: n.a., not available. SuSy1-3 represent isoforms of sucrose syntha

**Table S6.** Recent enzymatic and whole-cell systems for the biosynthesis of Rebaudioside M.

| System type                                     | Host/format                     | Enzyme(s)/strategy                                                                                                             | Substrate(s)     | Reb-M titer (g/L)/yield                             | Reference  |
|-------------------------------------------------|---------------------------------|--------------------------------------------------------------------------------------------------------------------------------|------------------|-----------------------------------------------------|------------|
| <b><i>In vitro</i><br/>multi-enzyme cascade</b> | Crude enzyme                    | UGT76G1-M88V coupled with <i>GmSuSy</i>                                                                                        | Reb-D            | 92.40% yield in 36 h                                | 21         |
|                                                 | Crude enzyme                    | UGT76G1(T284S/M88L/L200A) coupled with <i>GmSuSy</i>                                                                           | Reb-D            | 26.03 g/L Reb-M; 100% conversion of Reb-D           | 22         |
|                                                 | Crude enzymes                   | UGT94B1 (I146G/P174V) and UGT76G1-M3                                                                                           | Stevioside/Reb-A | 38.8 g/L Reb-M; 85.5% yield                         | 23         |
|                                                 | Purified enzymes                | UGT76G1 (T284S/M88L/L200A) coupled with <i>AtSuSy</i>                                                                          | Reb-D            | 23.37 g/L Reb-M from 22.5 g/L Reb-D; 90.50%         | 1          |
|                                                 | Purified enzymes                | UGT76G1 (S195Q) coupled with <i>McSuSy</i>                                                                                     | Reb-E            | 12.8 g/L Reb-M from 20 g/L Reb-E; 64% yield in 32 h | 24         |
|                                                 | Purified enzymes                | Co-immobilized; EUGT11 and UGT76G1                                                                                             | Reb-A            | 4.82 g/L Reb-M; 72.2% yield                         | 25         |
| <b>whole-cell</b>                               | Purified enzymes                | UGT76G1 (I30M/K53A/R141P/G349P)                                                                                                | Reb-D            | 29.24 g/L Reb-M; 90.6% yield                        | 26         |
|                                                 | <i>Pichia pastoris</i>          | Fusion enzyme; UGT76G1 and UGT91C1                                                                                             | Reb-A            | 0.31 g/L Reb-M; 95% yield in 96 h                   | 27         |
|                                                 | <i>Saccharomyces cerevisiae</i> | Co-expressing UGT91D2, UGT76G1, UGP1, SIR2                                                                                     | Stevioside       | 12.5 g/L Reb-M; 77.9% yield in 108 h                | 28         |
|                                                 | <i>E. coli</i>                  | Co-expressing UGT76G1 (T284S/M88L/L200A) and <i>GmSuSy</i> ; Multi-Copy and RBS Engineering; Fed-Batch; Byproduct valorization | Reb-D            | 30.56 g/L Reb-M; 95.9%                              | This study |

Note: MCSuSy: sucrose synthase from *Micractinium conductrix*; EUGT11: glycosyltransferase from *Oryza sativa*; *UGP1*: phosphoglucomutase; SIR2: silencing

information regulator 2

## Figures

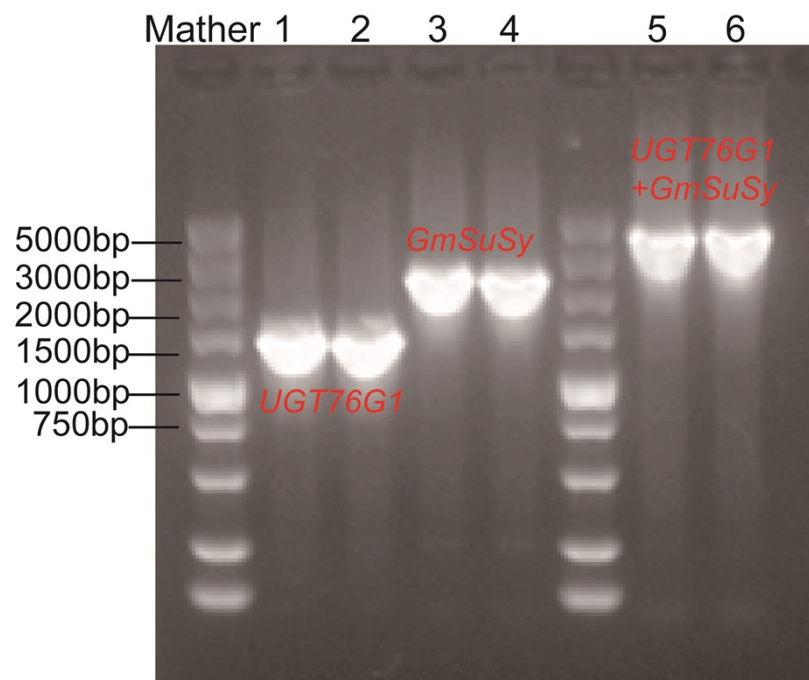

**Fig. S1.** Colony PCR verification of the engineered strain BL0. Lanes 1-2 show a single band between 1,300 and 1,500 bp, consistent with UGT76G1 (expected 1,410 bp). Lanes 3-4 show a single band between 2,000 and 3,000 bp, consistent with GmSuSy (expected 2,649 bp). Lanes 5-6 show two bands between 1,300 and 1,500 bp (UGT76G1) and between 2,000 and 3,000 bp (GmSuSy), indicative of single-plasmid co-expression clones.

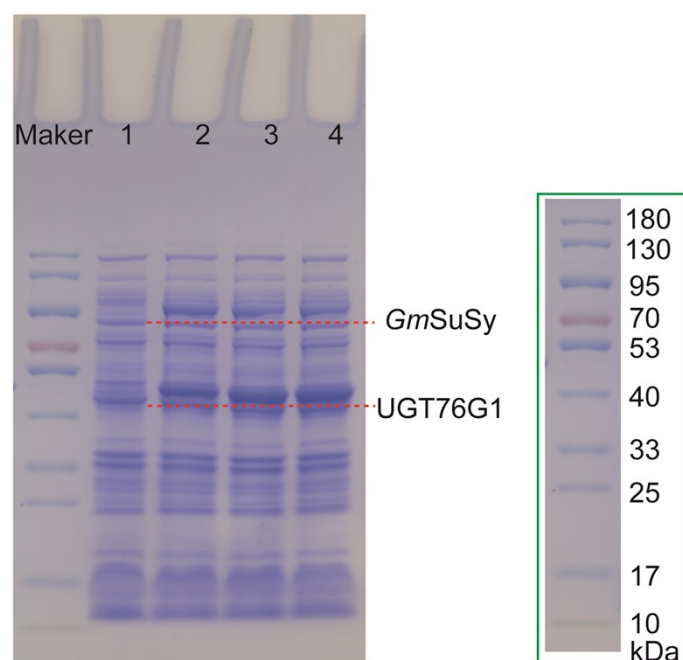

**Fig. S2.** Uncropped, full-length SDS-PAGE gels corresponding to Fig. 2d, showing the expression of UGT76G1 and GmSuSy in recombinant strains. Lane M, protein marker; lane 1, BL (uninduced control); lane 2, BL0 (1:1 copy ratio); lane 3, BL1 (2:1); lane 4, BL2 (3:1).



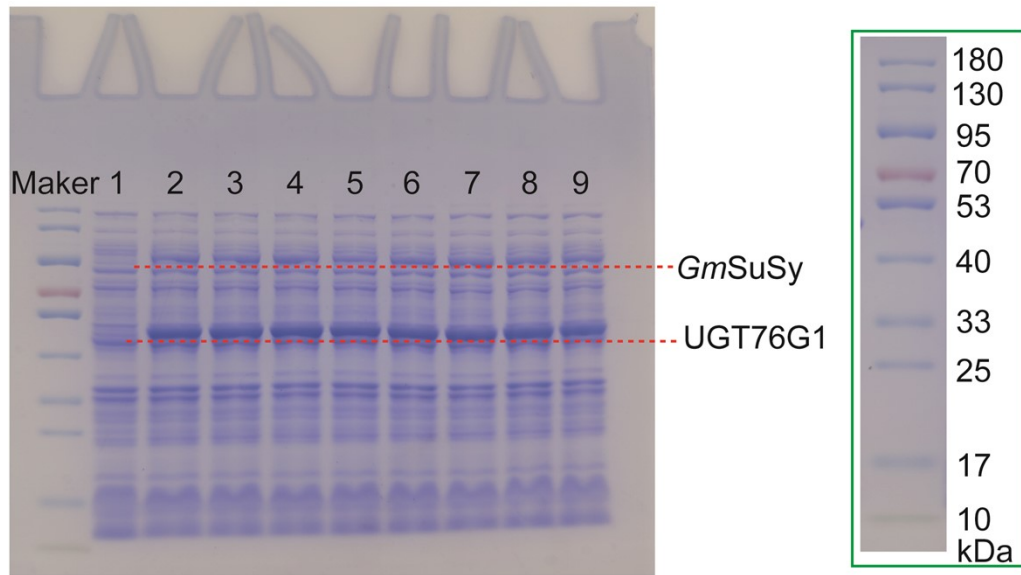

**Fig. S3.** Uncropped, full-length SDS-PAGE gels corresponding to Fig. 3c, showing expression of UGT76G1 and GmSuSy in recombinant strains BL2-BL9 with different ribosome-binding site (RBS) strengths. Lane M, protein marker; lane 1, BL (uninduced control); lanes 2-9, BL2-BL9

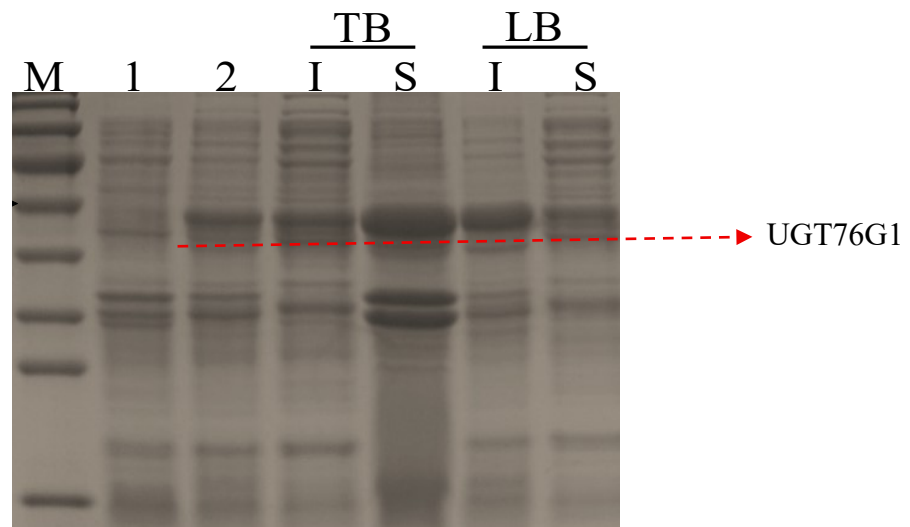

**Fig. S4.** SDS-PAGE analysis of soluble and insoluble fractions of UGT76G1 expressed in *E. coli* BL21(DE3)/pRSF-UGT76G1 cultured in TB and LB media. Lane M: protein marker; Lane 1: blank (negative control); Lane 2: positive control; Lanes S and I (TB): soluble and insoluble fractions from cells grown in TB medium; Lanes S and I (LB): soluble and insoluble fractions from cells grown in LB medium.

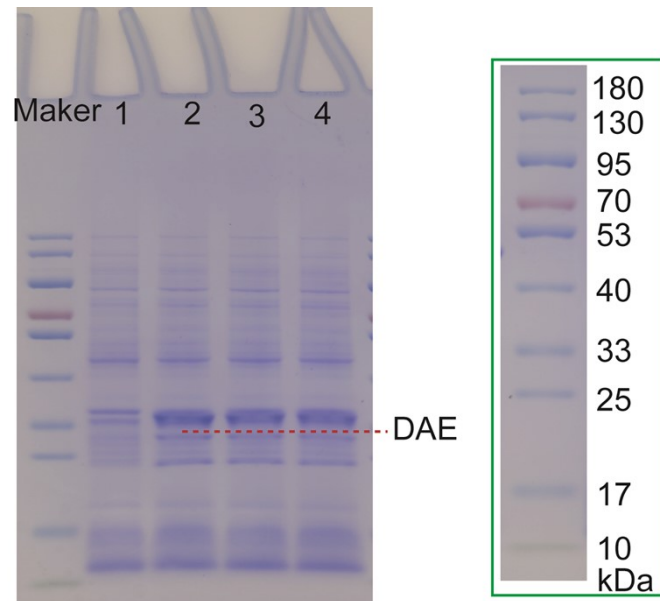

**Fig. S5.** SDS-PAGE analysis of recombinant D-allulose 3-epimerase (DAE) expressed in *E. coli* BL21(DE3). Lane 1, BL21(DE3) host (uninduced control); lanes 2-4, IPTG-induced cell lysates showing a prominent band at 33-40 kDa, consistent with DAE (expected 34.2 kDa).

## References

1. B. Guo, Z. Deng, F. Meng, Q. Wang, Y. Zhang, Z. Yuan and Y. Rao, *Journal of Agricultural and Food Chem*, 2022, **70**, 5088-5094.
2. Z. Bieniawska, D. H. Paul Barratt, A. P. Garlick, V. Thole, N. J. Kruger, C. Martin, R. Zrenner and A. M. Smith, *Plant*, 2007, **49**, 810-828.
3. E. Baroja-Fernández, F. J. Muñoz, J. Li, A. Bahaji, G. Almagro, M. Montero, E. Etxeberria, M. Hidalgo, M. T. Sesma and J. Pozueta-Romero, *PNAS*, 2012, **109**, 321-326.
4. D. H. Barratt, L. Barber, N. J. Kruger, A. M. Smith, T. L. Wang and C. Martin, *Plant physiol*, 2001, **127**, 655-664.
5. K. Tanase and S. Yamaki, *Plant Cell Physiol*, 2000, **41**, 408-414.
6. D. P. Delmer, *J. Biol. Chem*, 1972, **247**, 3822-3828.
7. T. Murata, *Agric. Biol. Chem*, 1971, **35**, 1441-1448.
8. L. Bungaruang, A. Gutmann and B. Nidetzky, *Adv Synth Catal*, 2013, **355**, 2757-2763.
9. E. Baroja-Fernández, F. J. Muñoz, T. Saikusa, M. Rodríguez-López, T. Akazawa and J. Pozueta-Romero, *Plant Physiol*, 2003, **44**, 500-509.
10. T. Moriguchi and S. Yamaki, *Plant Physiol*, 1988, **29**, 1361-1366.
11. J. Sun, T. Loboda, S. J. Sung and C. C. Black, *Plant Physiol*, 1992, **98**, 1163-1169.
12. R. N. Shukla and G. G. Sanwal, *Arch Biochem Biophys*, 1971, **142**, 303-309.
13. T. Murata, *Agric. Biol. Chem*, 1972, **36**, 1815-1818.
14. C.-Y. Tsai, *Phytochemistry*, 1974, **13**, 885-891.
15. K. L. Klotz, F. L. Finger and W. L. Shelver, *Plant Physiol. Biochem*, 2003, **41**, 107-115.
16. K. Chen, Y. Liao, X. Chen, K. Chen, W. Song, L. Zhu, Y. Li and H. Jia, *Biotechnol*, 2025, **405**, 169-181.
17. M. Diricks, F. De Bruyn, P. Van Daele, M. Walmagh and T. Desmet, *Appl Microbiol Biotechnol*, 2015, **99**, 8465-8474.
18. C. M. Figueroa, M. D. Asención Diez, M. L. Kuhn, S. McEwen, G. L. Salerno, A. A. Iglesias and M. A. Ballicora, *FEBS Lett*, 2013, **587**, 165-169.
19. L. Curatti, A. C. Porchia, L. Herrera-Estrella and G. L. Salerno, *Planta*, 2000, **211**, 729-735.
20. K. Chen, L. Lin, R. Ma, J. Ding, H. Pan, Y. Tao, Y. Li and H. Jia, *Front. Microbiol*, 2023, **Volume 14 - 2023**.
21. L. Zhao, Y. Liu, Y. Li, F. Pan, T. Yang, Z. Yang, X. Lv, L. Zhao and C. Wang, *Food Bioscie*, 2024, **61**, 104795.
22. J. Yu, Y. Tao, H. Pan, L. Lin, J. Sun, R. Ma, Y. Li and H. Jia, *Journal of Functional Foods*, 2022, **92**, 105033.
23. Z. Luo, X. Guo, Z. Deng, D. Guo, Y. Zhang, C. Liu, Z. Yuan and Y. Rao, *Green*

*Chemistry*, 2025, DOI: 10.1039/D5GC03693C.

24. Y. Wang, X. Luo, M. Zhou, X. Yu, H. Wahia, X. Lu and C. Zhou, *Innovative Food Sci. Emerg. Technol*, 2026, **107**, 104330.
25. Z. Wang, W. Liu, W. Liu, Y. Ma, Y. Li, B. Wang, X. Wei, Z. Liu and H. Song, *RSC Adv*, 2021, **11**, 15785-15794.
26. M. Yang, S. Yang, Z. Deng, Y. Zhang, Z. Yuan and Y. Rao, *Food Bioscie*, 2023, **56**, 103119.
27. X. Wang, J. Li, L. Li, L. Zhu and F. Huang, *Mol. Catal*, 2023, **547**, 113317.
28. S. Li, S. Luo, X. Zhao, S. Gao, X. Shan, J. Lu and J. Zhou, *J. Agric. Food Chem*, 2024, **72**, 8140-8148.
